# Supplementary material for: Sporadic sampling, not climatic forcing, drives observed early hominin diversity
Source: PubMed Central journal article supplement — Proc Natl Acad Sci U S A. 2018 Apr 23;115(19):4891–6. doi: 10.1073/pnas.1721538115 (PMC5948983; doi:10.1073/pnas.1721538115), 2018-04-23
Supplement: pnas.1721538115.sapp.pdf [file pnas.1721538115.sapp.pdf]

## **SUPPLEMENTARY INFORMATION (SI) APPENDIX**

1. List of hominin-bearing formations (HBF)
2. List of primate-bearing formations (PBF)
3. List of mammal-bearing formations (MBF)
4. List of hominin-bearing collections (HBC)
5. Detailed description of each phylogenetic diversity estimate (PDE)
6. Testing the redundancy hypothesis: results of the randomised trials
7. Treatment of the South African deposits in the hominin-bearing formation count
8. Pairwise correlations using 0.5 million-year (Myr) time bins
9. SI Figures
10. SI Tables
11. Supplementary Information (SI) Bibliography

## **1. List of hominin-bearing formations (HBF)**

Here, all hominin-bearing deposits in the Cradle of Humankind (CoH), South Africa, are counted as one formation. This includes: Sterkfontein, Swartkrans, Kromdraai, Drimolen, Gondolin, Gladysvale, etc. Geological formations are rock units of defined areal and temporal extent; this is not the case in CoH, where each cave is usually assigned to its own geological formation. Including each CoH site as a distinct geological formation is equivalent to a locality count. Makapansgat and Taung are each counted as separate formations given their geographical separation from the CoH. If a taxon's first or last appearance date falls on the boundary of a time bin (e.g., 2 Ma) then it is counted as present only in the younger (i.e., 2-1.75 Ma) and not the older (i.e., 2.25-2 Ma) bin. This applies to hominins, primates, and mammals.

### **7–6.75 Ma: 1**

Anthracotheriid Unit (1,2)

### **6.75–6.5 Ma: 0**

NA

### **6.5–6.25 Ma: 1**

Adu-Asa Fm. (3)

### **6.25–6 Ma: 1**

Lukeino Fm. (4)

### **6–5.75 Ma: 2**

Lukeino Fm. (4), Adu-Asa Fm. (5,6)

### **5.75–5.5 Ma: 2**

Lukeino Fm. (4), Adu-Asa Fm. (5,7)

### **5.5–5.25 Ma: 1**

Adu-Asa Fm. (3)

### **5.25–5 Ma: 1**

Sagantole Fm. (5)

### **5–4.75 Ma: 0**

NA

### **4.75–4.5 Ma: 1**

Sagantole Fm. (8)

### **4.5–4.25 Ma: 2**

Sagantole Fm. (8–11), Chemeron Fm. (12)

### **4.25–4 Ma: 4**

Sagantole Fm. (13), Hadar Fm. (14), Mount Galili Fm. (15), Kanapoi Fm. (16,17)

### **4–3.75 Ma: 3**

Koobi Fora Fm. (16,17), Laetoli Beds (18), Sagantole Fm. (19)

### **3.75–3.5 Ma: 5**

Laetoli Beds (18), Nachukui Fm. (20), Hadar Fm. (21), Koro Toro (22), Woranso-Mille (23)

**3.5–3.25 Ma: 5**

Hadar Fm. (24), Koobi Fora Fm. (25), Nachukui Fm. (20,26), Matabaietu Fm. (27),  
Woranso-Mille (28)

**3.25–3 Ma: 2**

Hadar Fm. (24), Nachukui Fm. (20)

**3–2.75 Ma: 3**

Hadar Fm. (24), Usno Fm. (29,30), Makapansgat (31)

**2.75–2.5 Ma: 5**

CoH (31), Ndolanya Beds (18), Shungura Fm. (32), Nachukui Fm. (32), Taung (33)

**2.5–2.25 Ma: 7**

CoH (34), Bouri Fm. (35), Shungura Fm. (32), Nachukui Fm. (32), Chiwondo Beds (36),  
Chemeron Fm. (37), Busidima Fm. (38)

**2.25–2 Ma: 3**

CoH (31), Koobi Fora Fm. (39), Shungura Fm. (40)

**2–1.75 Ma: 5**

CoH (41), Koobi Fora Fm. (32), Olduvai Fm. (42), Shungura Fm. (32), Busidima Fm. (43)

**1.75–1.5 Ma: 7**

CoH (44), Koobi Fora Fm. (32), Nachukui Fm. (45), Humbu Fm. (46), Olduvai Fm. (47),  
Melka Kunture Fm. (48), Busidima Fm. (49)

**1.5–1.25 Ma: 8**

CoH (50), Shungura Fm. (32), Konso Fm. (51), Chemoigut Fm. (52), Olduvai Fm. (53), Koobi  
Fora Fm. (32), Nachukui Fm. (32), Melka Kunture Fm. (54)

**1.25–1 Ma: 3**

CoH (55), Olduvai Fm. (46), Konso Fm. (51)

## **2. List of primate-bearing formations (PBF)**

The stratigraphy of some primate-bearing deposits in northern and southern Africa is poorly understood, hence geological formations have not been formally assigned. In these cases, the name of the locality is given. As above, all localities in the CoH are counted as one formation. The same treatment is applied to the karst deposits of Angola, Botswana, and Namibia: PBFs are grouped by geographical proximity into Koanaka (Botswana), the Humpata Plateau (Angola; including the primate-bearing localities of Cangalongue, Tchiua, and Malola), and the Otavi Mountains (Namibia; including the primate-bearing localities of Jägersquelle and Uisib). PBF counts named after a locality can be differentiated from formalised geological formations by the lack of Fm. or Beds preceding the formation name.

### **7–6.76 Ma: 2**

Anthracotheiid Unit (1,2), Menacer (56)

### **6.75–6.5 Ma: 0**

NA

### **6.5–6.25 Ma: 3**

Adu-Asa Fm. (3), Nkondo Fm. (57), Mpesida Beds (58)

### **6.25–6 Ma: 3**

Lukeino Fm. (4), Nkondo Fm. (57), Lemudong'o (59)

### **6–5.75 Ma: 4**

Lukeino Fm. (4), Adu-Asa Fm. (5,6), Wadi Natron (60,61), Ongoliba Beds (62)

### **5.75–5.5 Ma: 2**

Lukeino Fm. (4), Adu-Asa Fm. (5,7)

### **5.5–5.25 Ma: 2**

Adu-Asa Fm. (3), Sagantole Fm. (63)

### **5.25–5 Ma: 2**

Sagantole Fm. (5), Varswater Fm. (64)

### **5–4.75 Ma: 3**

Mabaget Fm. (65), Nawata Fm. (66), Varswater Fm. (64)

### **4.75–4.5 Ma: 1**

Sagantole Fm. (8)

### **4.5–4.25 Ma: 2**

Sagantole Fm. (8–11), Chemeron Fm. (12)

### **4.25–4 Ma: 4**

Sagantole Fm. (13), Hadar Fm. (14), Mount Galili Fm. (15), Kanapoi Fm. (16,17)

### **4–3.75 Ma: 3**

Koobi Fora Fm. (16,17), Laetoli Beds (18), Sagantole Fm. (19)

### **3.75–3.5 Ma: 7**

Laetoli Beds (18), Nachukui Fm. (20), Hadar Fm. (21), Koro Toro (22), Warwire Fm. (62), Koobi Fora Fm. (67), Woranso-Mille (23)

**3.5–3.25 Ma: 8**

Hadar Fm. (24), Koobi Fora Fm. (25), Nachukui Fm. (20,26), Matabaietu Fm. (27), Shungura Fm. (68), Laetoli Beds (69), Makapansgat (70,71), Woranso-Mille (28)

**3.25–3 Ma: 5**

Hadar Fm. (24), Shungura Fm. (68), Nachukui Fm. (20), Makapansgat (70,71), Koobi Fora Fm. (67,68)

**3–2.75 Ma: 7**

CoH (70,71), Hadar Fm. (24), Shungura Fm. (68), Usno Fm. (29,30), Makapansgat (31), Taung (71), Koobi Fora Fm. (67,68)

**2.75–2.5 Ma: 7**

CoH (31), Ndolanya Beds (18), Shungura Fm. (32), Nachukui Fm. (32), Taung (33), Chemeron Fm. (12), Makapansgat (70,71)

**2.5–2.25 Ma: 9**

CoH (34), Bouri Fm. (35), Shungura Fm. (32), Nachukui Fm. (32), Chiwondo Beds (36), Chemeron Fm. (37), Busidima Fm. (38), Matabaietu Fm. (72,73), Ahl al Oughlam (74)

**2.25–2 Ma: 6**

CoH (31), Koobi Fora Fm. (39), Shungura Fm. (40), Lusso Beds (75), Chemeron Fm. (72,73), Ain Jourdel (76)

**2–1.75 Ma: 12**

CoH (41), Koobi Fora Fm. (32), Olduvai Fm. (42), Shungura Fm. (32), Busidima Fm. (43), Rawi Fm. (77), Konso Fm. (78), Kaiso Village Fm. (62), Nachukui Fm. (66), Koanaka (79), Humpata (79), Otavi (79)

**1.75–1.5 Ma: 9**

CoH (44), Koobi Fora Fm. (32), Nachukui Fm. (45), Humbu Fm. (46), Olduvai Fm. (47), Melka Kunture Fm. (48), Busidima Fm. (49), Shungura Fm. (68), Konso Fm. (78)

**1.5–1.25 Ma: 8**

CoH (50), Koobi Fora Fm. (32), Nachukui Fm. (32), Shungura Fm. (68), Konso Fm. (78), Chemoigut Fm. (52), Olduvai Fm. (53), Melka Kunture Fm. (54)

**1.25–1 Ma: 3**

CoH (55), Olduvai Beds (46), Konso Fm. (51,78)

### **3. List of terrestrial macro-mammal-bearing formations (MBF)**

#### **7–6.75 Ma: 5**

Anthrotheriid Unit (1,2), Menacer (56), Aranga (80), Douaria (81), Oluka Fm. (62)

#### **6.75–6.5 Ma: 0**

#### **6.5–6.25 Ma: 3**

Adu-Asa Fm. (3), Nkondo Fm. (57), Mpesida Beds (58)

#### **6.25–6 Ma: 4**

Adu-Asa Fm. (82), Lukeino Fm. (4), Nkondo Fm. (57), Lemudong'o (59)

#### **6–5.75 Ma: 7**

Adu-Asa Fm. (5,6), Lukeino Fm. (4), Nkondo Fm. (62), Hondeklip Bay (83), Lissasfa (84), Wadi Natron (60,61), Ongoliba Beds (62)

#### **5.75–5.5 Ma: 3**

Lukeino Fm. (4), Adu-Asa Fm. (5,7), Sagantole Fm. (85)

#### **5.5–5.25 Ma: 6**

Adu-Asa Fm. (3), Sagantole Fm. (63), Wembere-Manonga Fm. (86), Chemeron Fm. (12), Kossom Bougoudi (87)

#### **5.25–5 Ma: 4**

Sgantole Fm. (5), Wembere-Manonga Fm. (86), Chemeron Fm. (12), Varswater Fm. (64)

#### **5–4.75 Ma: 9**

Sgantole Fm. (85), Wembere-Manonga Fm. (86), Chemeron Fm. (12), Varswater Fm. (64), Kazinga Beds (88), Mabaget Fm. (65), Nawata Fm. (66), Nkondo Fm. (62), Nyaburogo Fm. (62)

#### **4.75–4.5 Ma: 4**

Sgantole Fm. (8), Wembere-Manonga Fm. (86), Chemeron Fm. (12), Nkondo Fm. (62)

#### **4.5–4.25 Ma: 6**

Sgantole Fm. (8–11), Wembere-Manonga Fm. (86), Chemeron Fm. (12), Warwire Fm. (62), Chiwondo Beds (89), Mursi Fm. (90)

#### **4.25–4 Ma: 11**

Sgantole Fm. (13), Wembere-Manonga Fm. (86), Chemeron Fm. (12), Chiwondo Beds (89),

Mursi Fm. (90), Kanapoi Fm. (16,17), Nachukui Fm. (91), Mount Galili Fm. (15), Sinda Beds ( ), Koobi Fora Fm. (92), Hadar Fm. (14)

#### **4–3.75 Ma: 10**

Sagantole Fm. (19), Wembere-Manonga Fm. (86), Chemeron Fm. (12), Chiwondo Beds (89), Koobi Fora Fm. (16,17), Warwire Fm. (62), Kolle (93), Laetoli Beds (18), Shungura Fm. (92), Nachukui Fm. (91)

#### **3.75–3.5 Ma: 10**

Chiwondo Beds (89), Shungura Fm. (92), Nachukui Fm. (91), Laetoli Beds (18), Koro Toro (22), Usno Fm. (94), Warwire Fm. (62), Koobi Fora Fm. (92), Hadar Fm. (21), Woranso-Mille (23)

#### **3.5–3.25 Ma: 10**

Chiwondo Beds (89), Shungura Fm. (68), Nachukui Fm. (91), Usno Fm. (94), Makapansgat (70,71), Koobi Fora Fm. (92), Laetoli Beds (69), Hadar Fm. (24), Matabaietu Fm. (27), Woranso-Mille (28)

#### **3.25–3 Ma: 7**

Chiwondo Beds (89), Shungura Fm. (68), Nachukui Fm. (20), Usno Fm. (94), Koobi Fora Fm. (67,68), Makapansgat (70,71), Hadar Fm. (24)

#### **3–2.75 Ma: 12**

Chiwondo Beds (89), Shungura Fm. (68), Nachukui Fm. (91), Usno Fm. (29,30), Koobi Fora Fm. (67,68), Makapansgat (31), Hadar Fm. (24), CoH (70,71), Kyeoro Fm. (62), Rawi Fm. (77), Chemeron Fm. (12), Taung (71)

#### **2.75–2.5 Ma: 12**

Chiwondo Beds (89), Shungura Fm. (32), Nachukui Fm. (32), Usno Fm. ( ), Koobi Fora Fm. (92), Makapansgat (70,71), CoH (31), Rawi Fm. (95), Chemeron Fm. (12), Taung (33), Ndolanya Beds (18), Busidima Fm. (85)

#### **2.5–2.25 Ma: 12**

Chiwondo Beds (36), Shungura Fm. (32), Nachukui Fm. (32), Makapansgat (96), CoH (34), Chemeron Fm. (37), Busidima Fm. (38), Ahl al Oughlam (74), Bouri Fm. (35), Matabaietu Fm. (72,73), Lusso Beds (75), Kaiso Village Fm. (62)

#### **2.25–2 Ma: 12**

Chiwondo Beds (89), Shungura Fm. (4), Nachukui Fm. (91), CoH (31), Busidima Fm., Matabaietu Fm. (72,73), Lusso Beds (75), Ain Jourdel (76), Kanjera Fm. (95), Hajaro Fm. (96), Koobi Fora Fm. (39), Chemeron Fm. (72,73)

#### **2–1.75 Ma: 17**

Chiwondo Beds (89), Shungura Fm. (32), Nachukui Fm. (66), CoH (41), Busidima Fm. (43), Matabaietu Fm. (), Lusso Beds (75), Kanjera Fm. (95), Hajaro Fm. (96), Humpata (79), Koanaka (79), Otavi (79), Koobi Fora Fm. (32), Konso Fm. (78), Olduvai Fm. (42), Rawi Fm. (77), Kaiso Village Fm. (62)

**1.75–1.5 Ma: 14**

Chiwondo Beds (89), Shungura Fm. (68), Nachukui Fm. (45), CoH (44), Busidima Fm. (49), Hajaro Fm. (96), Koobi Fora Fm. (32), Konso Fm. (78), Olduvai Fm. (47), Humbu Fm. (46), Melka Kunture Fm. (48), Anabo Koma (97), Barogoli (98), Chemoigut Fm. (52)

**1.5–1.25 Ma: 17**

Chiwondo Beds (89), Shungura Fm. (68), Nachukui Fm. (32), CoH (50), Busidima Fm. (85), Koobi Fora Fm. (32), Konso Fm. (78), Olduvai Fm. (53), Humbu Fm. (99), Melka Kunture Fm. (54), Barogoli (98), Chemoigut Fm. (52), Museta Beds (100), Nyabusosi Fm. (62), Moinik Fm. (100), Bukra Fm. (101), Manyara Beds (89)

**1.25–1 Ma: 11**

Chiwondo Beds (89), Shungura Fm. (), Nachukui Fm. (91), CoH (55), Busidima Fm. (85), Koobi Fora Fm. (92), Olduvai Fm. (46), Moinik Fm., Bukra Fm. (101), Manyara Beds (89), Konso Fm. (51,78)



#### 4. List of hominin-bearing collections (HBC)

A list of all early hominin-bearing collections (in 0.25-Myr time bins) is shown below. A collection is defined as an assemblage of fossils collected from a single locality in a single effort, or linked series of efforts. It is equivalent to a field season and thus represents the amount of human effort in a given time bin. If, for example, a formation produced several different taxa in the same year, this is counted as a single effort and thus one collection. Information on the duration and number of field seasons at a locality are not commonly provided so, instead, we use the number of years that have produced an assemblage of hominin fossils in each time bin. If a taxon's first or last appearance date falls on the boundary of a time bin (e.g., 2 Ma) then it is counted as present only in the younger (i.e., 2–1.75 Ma) and not the older (i.e., 2.25–2 Ma) bin.

\*Uncertain taxonomy.

##### 7–6.75 Ma: 2

*Sahelanthropus tchadensis*:

Anthracotheriid Unit (2002, 2005)

##### 6.75–6.5 Ma: 0

NA

##### 6.5–6.25 Ma: 1

*Ardipithecus kadabba*:

Adu-Asa Fm. (2004)

##### 6.25–6 Ma: 1

*Orrorin tugenensis*:

Lukeino Fm. (2000)

##### 6–5.75 Ma: 6

*Orrorin tugenensis*:

Lukeino Fm. (1974, 2000, 2001)

*Ardipithecus kadabba*:

Adu-Asa Fm. (1998, 2001, 2002)

##### 5.75–5.5 Ma: 5

*Orrorin tugenensis*:

Lukeino Fm. (2000)

*Ardipithecus kadabba*:

Adu-Asa Fm. (1997, 1998, 1999, 2005)

##### 5.5–5.25 Ma: 4

*Ardipithecus kadabba*:

Adu-Asa Fm. (1998, 2003, 2004, 2013)

##### 5.25–5 Ma: 1

*Ardipithecus kadabba*:

Adu-Asa Fm. (1999)

##### 5–4.75 Ma: 0

NA

##### 4.75–4.5 Ma: 2

*Ardipithecus ramidus*:

Sagantole Fm. (1999, 2003)

**4.5–4.25 Ma: 13**

*Ardipithecus ramidus*:

Chemeron Fm. (1984)

Sagantole Fm. (1992, 1993, 1994, 1995, 1996, 1997, 1998, 1999, 2000, 2001, 2002, 2003)

**4.25–4 Ma: 15**

*Australopithecus anamensis*:

Sagantole Fm. (1994, 2000, 2002, 2004, 2005)

Harr Fm. (1990)

Mount Galili Fm. (2000)

Kanapoi Fm. (1965, 1994, 1995, 1996, 1997, 2003, 2007, 2008)

**4–3.75 Ma: 8**

*Australopithecus anamensis*:

Koobi Fora Fm. (1982, 1987, 1988, 1995, 1996, 1997)

*Australopithecus afarensis*:

Sagantole Fm. (1981)

Laetoli Beds (1975)

**3.75–3.5 Ma: 20**

*Australopithecus afarensis*:

Laetoli Beds (1935, 1939, 1974, 1975, 1976, 1978, 1979, 1987, 2000)

Woranso-Mille (2005)

*Australopithecus* sp.:

Woranso-Mille (2004, 2005, 2006, 2007, 2008, 2009, 2010, 2012)

*Australopithecus bahrelghazali*:

Koro Toro (1995, 1996)

*Kenyanthropus platyops*:

Nachukui Fm. (1999)

**3.5–3.25 Ma: 26**

*Australopithecus afarensis*:

Hadar Fm. (1973, 1974, 1975, 1976, 1990, 1993, 1994, 1999, 2000, 2002, 2003, 2007)

Koobi Fora Fm. (1974)

\*Nachukui Fm. (1990, 1991)

Matabaietu Fm. (1981, 1990)

*Australopithecus* sp.:

Woranso-Mille (2010, 2011)

*Australopithecus deyiremeda*:

Woranso-Mille (2006, 2011, 2012, 2013)

*Kenyanthropus platyops*:

Nachukui Fm. (1982, 1985, 1998, 1999)

**3.25–3 Ma: 13**

*Australopithecus afarensis*:

Hadar Fm. (1974, 1975, 1976, 1984, 1990, 1992, 1993, 1994, 1999, 2000, 2001)

*Kenyanthropus platyops*:

Nachukui Fm. (1998, 1999)

**3–2.75 Ma: 26**

*Australopithecus afarensis*:

Hadar Fm. (1992, 1993, 1994, 1999, 2000, 2001)

Usno Fm. (1967, 1968, 1973)  
*Australopithecus africanus*:  
Makapansgat (1947, 1948, 1949, 1953, 1955, 1956, 1958, 1960, 1961, 1963, 1975, 1977,  
1980, 1983, 1999, 2000)  
*Homo* sp.  
\*Ledi-Geraru(2013)

### **2.75—2.5 Ma: 32**

*Australopithecus africanus*:  
CoH (1936, 1938, 1947, 1948, 1949, 1968, 1969, 1971, 1972, 1973, 1974, 1975, 1976,  
1977, 1980, 1982, 1983, 1984, 1985, 1986, 1987, 1988, 1989)  
Taung (1924)  
*Paranthropus aethiopicus*:  
Nachukui Fm. (1985, 1998)  
Ndolanya Beds (1998, 2001)  
Shungura Fm. (1967, 1967, 1970, 1972)

### **2.5—2.25 Ma: 16**

*Australopithecus africanus*:  
CoH (1992)  
*Australopithecus garhi*:  
Bouri Fm. (1990, 1997)  
*Paranthropus aethiopicus*:  
Nachukui Fm. (1985, 1998)  
Shungura Fm. (1968, 1969, 1970, 1971, 1972, 1973)  
*Paranthropus boisei*:  
Chiwondo Beds (1996)  
Shungura Fm. (1970, 1971, 1972)  
*Homo habilis*:  
Busidima Fm. (1994)  
\*Chemeron Fm. (1965)  
*Homo rudolfensis*:  
Chiwondo Beds (1991, 2009)

### **2.25—2 Ma: 9**

*Paranthropus boisei*:  
Shungura Fm. (1968, 1970, 1971, 1973, 1976)  
*Homo habilis*:  
\*CoH (1949, 1976)  
\*Koobi Fora Fm. (2012)  
\*Shungura Fm. (1968, 1969, 1970, 1973)

### **2—1.75 Ma: 44**

*Australopithecus sediba*:  
CoH (2008)  
*Paranthropus boisei*:  
Koobi Fora Fm. (1969, 1971, 1972, 1973, 1975, 1976, 1977, 1980, 1985, 1990, 1992)  
Shungura Fm. (1970)  
Olduvai Fm. (1959, 1998, 2007)  
*Paranthropus robustus*:  
CoH: (1948, 1949, 1950, 1952, 1966, 1967, 1968, 1969, 1970, 1971, 1972, 1997)  
*Homo habilis*:  
Koobi Fora Fm. (1972, 1973, 1975)  
Olduvai Fm. (1959, 1960, 1961, 1968, 1969, 1970, 1972, 1976, 1986, 1995, **2006**)  
Shungura Fm. (1969, 1973)

*Homo rudolfensis*:

Koobi Fora Fm. (1971, 1972, 1973, 1975, 1976, 2007, 2008, 2009)

*Homo ergaster*:

Busidima Fm. (2001)

CoH (1949)

Koobi Fora Fm. (1972, 1974, 1975)

### **1.75—1.5 Ma: 34**

*Paranthropus boisei*:

Humbu Fm. (1964)

Olduvai Fm. (1959, 1960, 1969, 1988)

*Paranthropus robustus*:

CoH (1936, 1938, 1941, 1942, 1944, 1954, 1955, 1994, 1997, 2003, 2009)

*Homo habilis*:

Koobi Fora Fm. (1972, 1973)

Olduvai Fm. (1960, 1963, 1969, 1972, 1976, 2002, 2006)

*Homo ergaster*:

Busidima Fm. (1999)

Koobi Fora Fm. (1970, 1972, 1973, 1974, 1976, 1978, 2000)

Melka Kunture Fm. (1976)

Nachukui Fm. (1984, 1998, 1999)

Olduvai Fm. (1982)

### **1.5—1.25 Ma: 22**

*Paranthropus boisei*:

Chemoigut Fm. (1970, 1973, 1978)

Olduvai Fm. (1955, 1970, 1971, 2009)

*Paranthropus robustus*:

CoH (1949, 2001, 2002)

*Homo ergaster*:

Konso Fm. (1991, 1994, 1997, 2000)

Koobi Fora Fm. (1971, 1972, 1976, 2008)

Melka Kunture Fm. (1982)

Nachukui Fm. (1985)

Olduvai Fm. (1960)

Shungura Fm. (1971)

### **1.25—1 Ma: 10**

*Paranthropus robustus*:

CoH (1979, 1980, 1981, 1982, 1983, 1984, 1985, 1986)

*Homo ergaster*:

Konso Fm. (1996)

Olduvai Fm. (1962)

## 5. Detailed description of each phylogenetic diversity estimate (PDE)

The phylogenetic diversity estimates (PDE) for [Strait & Grine \(102; SPDE\)](#), [Dembo \*et al.\* \(103; D1PDE\)](#), [Haile-Selassie \*et al.\* \(104; HPDE\)](#), and [Dembo \*et al.\* \(105; D2PDE\)](#) are shown in Fig. S1 (see Table S1 for a list of abbreviations). SPDE, D1PDE, HPDE, and D2PDE all closely resemble one another both qualitatively (Fig. S1) and quantitatively (Table S2). However, there are minor differences between each PDE that are caused by: (i) different number of taxa included in each cladistics analysis; and (ii) topological differences between the resultant phylogenies.

*Different numbers of taxa.* SPDE matches D1PDE and D2PDE closely throughout much of the time period under study (Fig. S1), although D1PDE and D2PDE estimate a higher number of lineages between 2 and 3 Ma. This reflects the greater number of early hominins (14) incorporated into the [Dembo \*et al.\* \(103, 105\)](#) analyses compared to the [Strait & Grine \(102\)](#) analysis (13). The additional taxon, in this case the 1.98-Ma *Australopithecus sediba*, is repeatedly placed as the sister-taxon to the 2.33-Ma *Homo habilis*. The difference in peak diversity between SPDE (7) and D1PDE and D2PDE (8) is thus caused by the inclusion of *Au. sediba*. Similarly, the [Haile-Selassie \*et al.\* \(104\)](#) analysis also includes 14 taxa, but the additional taxon is the 3.3–3.5-Ma *Au. deyiremeda*. The latter is consistently placed as the sister-taxon of a clade containing *Au. africanus*, *Paranthropus*, and *Homo* (including *Kenyanthropus platyops*; ref. 104). The difference in the timing of peak diversity in HPDE is thus caused by the inclusion of *Au. deyiremeda* (Fig. S1).

*Different tree topologies.* The phylogenetic relationships of early hominins are hotly debated (see ref. 106), yet there are arguably only two unstable taxa: *K. platyops* and *Au. africanus*. The [Strait & Grine \(102\)](#) analysis places *K. platyops* as the sister-taxon of either *Paranthropus* or a *Paranthropus* + *Homo* clade. [Dembo \*et al.\* \(103\)](#) place *K. platyops* as the sister-taxon of all hominins except *Sahelanthropus tchadensis*, *Ardipithecus ramidus*, and *Au. anamensis*, whereas [Dembo \*et al.\* \(105\)](#) place *K. platyops* as the sister-taxon of all hominins except *S. tchadensis*, *Ar. ramidus*, *Au. anamensis*, *Au. afarensis*, and *Au. garhi*. The phylogenetic relationship of *K. platyops* to other hominins thus has little effect on SPDE, D1PDE, and D2PDE (Fig. S1 and Table S2). In contrast, [Haile-Selassie \*et al.\* \(104\)](#) place *K. platyops* as the sister-taxon of *H. rudolfensis*, and *K. platyops* + *H. rudolfensis* as the sister-taxon of *Paranthropus*. This implies a ghost lineage for *H. rudolfensis*, and *H. habilis* + *H. ergaster*, extending back to ca. 4 Ma. Despite this, HPDE does correlate significantly with SPDE, D1PDE, and D2PDE (Table S2).

[Strait & Grine \(102\)](#) place *Au. africanus* as the sister-taxon of *K. platyops*, *Paranthropus*, and *Homo*. [Dembo \*et al.\* \(103\)](#) place *Au. africanus* as the sister-taxon of *Au. sediba* and *Homo*, whereas [Dembo \*et al.\* \(105\)](#) place *Au. africanus* in a robust australopith clade. Despite the major systematic implications of each topology, the different placements of these taxa have little effect on the PDEs, probably because the clustering of nodes in each phylogeny tightly constrains the possible divergence dates of the species, irrespective of the exact topology.

*Reconstructing chronospecies as anagenetically evolving lineages.* It is often assumed that the chance of sampling an ancestor in the fossil record is negligible (e.g., ref. 107) to low (e.g., ref. 108). However, there is strong evidence that *Au. anamensis* and *Au. afarensis* (109), and *P. aethiopicus* and *P. boisei* (110), represent anagenetically evolving lineages (or

chronospecies). If ancestors are included in a cladogram, they will be interpreted as the sister-taxa to their descendants, leading to the inference of an incorrect ghost lineage and inflated PDE (111). To test whether the treatment of chronospecies as sister-taxa distorts PDEs, those trees that support hypotheses of ancestry (i.e., that reconstruct these taxa as time-successive sister-taxa) were re-drawn to represent the chronospecies as single lineages. These trees were time scaled using the *cal3* method and the median diversity calculated across all 1000 trees.

For those studies that support hypotheses of ancestry (refs. 109, 110), there are no major differences in the pattern of their diversity curves (Table S2). Although there are fewer lineages inferred under an anagenetic scenario, the overall pattern of peaks and troughs is similar, suggesting that (for early hominins at least) the inclusion of ancestors has no significant effect on PDEs (Table S2). Overall, each PDE displays a very similar curve, and any differences between estimates can be readily accounted for by taxon selection and tree topology.

## 6. Testing the redundancy hypothesis: results of the randomised trials

To test whether HBF is an independent sampling metric for the diversity of early hominins, a series of randomized trials were carried out (using the method described in ref. 112) to determine whether the correlation between TDE and HBF is an inevitable result of using a strict FFC (see Table S1 for a list of abbreviations). For each HBF, we generated a random species diversity of 0, 1, or 2, where 0 is equivalent to no fossil finds in a formation and 2 the maximum in-bin taxon to formation ratio in the early hominin fossil record (specifically the 6.25–6 Ma time bin). These data were then summed for each time bin according to the number of formations present and forty simulations were performed to assess the statistical significance of the results at the 95% confidence level (1). Not surprisingly, the simulated hominin diversity totals and HBF counts gave rank correlation coefficients equivalent to the actual data (mean = 0.666, median = 0.694). Moreover, the simulated hominin diversity totals showed a stronger correlation to HBF than the real data in 78% of cases. (Note we repeated the entire randomized trial 40 times and found this result to be highly robust.) Not only does this indicate that random data can produce a better fit than reality, but that this is by far the most likely result (*sensu* ref. 112). These simulations indicate that the tight correlation observed between TDE and HBF is undoubtedly a mix of both redundancy – HBF are probably driven more by TDE than by sampling – and a genuine signal of episodic preservation and sporadic sampling.

To assess the redundancy argument against PBF being a meaningful sampling metric for early hominins, we repeated the randomized trials above (112) and found that, although the mean rank correlation coefficient is moderately high ( $\rho = 0.580$ ), only 13% (10 – 20% across the 40 re-runs) of simulations produced correlation coefficients stronger than the actual data. Therefore, a highly significant correlation between TDE and PBF is not an inevitable consequence of the data, suggesting a reduced role for redundancy compared to HBF. This interpretation is reinforced by the fact that the positive correlation actually increases from HBF to PBF counts (Table S2).

## **7. Treatment of the South African deposits in the hominin-bearing formation count**

Geological formations are rock units of defined areal and temporal extent; this is not the case in Cradle of Humankind (CoH), South Africa, where each cave is informally assigned to its own geological formation. To combat this the fossil-bearing deposits of Sterkfontein, Swartkrans, Kromdraai, Drimolen, Gondolin, Gladysvale, Cooper's Cave, and Malapa, were counted as one formation. Including each CoH site as a distinct geological formation is, therefore, equivalent to a locality count (and not a proxy for geological sampling bias). Makapansgat and Taung were each counted as separate formations given their geographical separation from the CoH. Lumping of the South African deposits into one "formation" is equivalent in geographical extent and geological time to a typical East African formation. Thus, treating these sedimentary deposits as three separate formations made for better comparability to the deposits that dominate the data set, i.e., those found throughout East Africa.

Treating the deposits at Cooper's Cave, Drimolen, Gladysvale, Gondolin, Kromdraai, Malapa, Sterkfontein, and Swartkrans (South Africa) as separate (informal) "formations" had minimal effect on the results. There is a strong correlation between this sampling metric (call it the number of hominin-bearing deposits) and the number of hominin-bearing formations ( $\rho = 0.941, p = 0.000003009$ ), hominin-bearing collections (Spearman's  $\rho = 0.534, p = 0.00968$ ), and primate-bearing formations ( $\rho = 0.721, p = 0.0001556$ ). There is also a strong correlation between the number of hominin-bearing deposits and the taxic diversity estimate ( $\rho = 0.734, p = 0.0001027$ ). (Note all times series have undergone generalized differencing.) Thus, the treatment of the South African deposits as three formations (CoH, Makapansgat, Taung) had little effect on the results. In fact, in each comparison, the number of hominin-bearing deposits correlates stronger than HBF, reiterating the strong relationship between apparent diversity and sampling metrics.



## **8. Pairwise correlations using 0.5 million-year (Myr) time bins:**

Fossil record completeness is inversely proportional to temporal resolution: if one uses coarser time bins to assess diversity then more fossil occurrences will fall in each time bin and the fossil record will appear, compared to finer time bins, less gappy. In order to test whether the strong correlation between the taxic diversity estimate (TDE) and fossil sampling (specifically primate-bearing formation [PBF] counts) is a result of our choice of 0.25-Myr time bins, we repeated the correlations using 0.5 Myr time bins. If the support for a major sampling component in early hominin diversity is the product of finer time bins inflating fossil record incompleteness, then one would expect the correlation to disappear using coarser time bins. However, this is not the case: a correlation between TDE and PBF, and lack of a correlation between TDE and aridity, are still recovered using coarser time bins (see correlation coefficients below).

### **TDE/PBF:**

Spearman's rho = 0.800 ( $p = 0.005202$ )

Kendall tau = 0.673 ( $p = 0.003106$ )

### **TDE/aridity:**

Spearman's rho = 0.282 ( $p = 0.4021$ )

Kendall tau = 0.200 ( $p = 0.4454$ )

### **PBF/aridity:**

Spearman's rho = 0.073 ( $p = 0.8388$ )

Kendall tau = 0.018 ( $p = 1$ )

## 9. SUPPLEMENTARY INFORMATION (SI) FIGURES

**Figure S1:** Early hominin diversity estimates through geological time. **A**, Taxic diversity estimate (TDE); **B**, [Strait & Grine \(102\)](#) phylogenetic diversity estimate (SPDE); **C**, [Dembo \*et al.\* \(103\)](#) phylogenetic diversity estimate (D1PDE); **D**, [Haile-Selassie \*et al.\* \(104\)](#) phylogenetic diversity estimate (HPDE); and **E**, [Dembo \*et al.\* \(105\)](#) phylogenetic diversity estimate (D2PDE). Total bin diversity (including range-through taxa) is plotted at the midpoint age of each bin. The blue envelopes (**B–E**) represent upper and lower 95% confidence intervals based on 1000 time-scaling replicates.

**Figure S2:** Early hominin collector curves. **A**, Cumulative number of named early African hominin species through research time ( $R^2 = 0.98$ ,  $y = 2 \times 10^{-27}e^{-0.032x}$ ); **B**, Cumulative number of named geological formations that have yielded a named early African hominin species through research time ( $R^2 = 0.94$ ,  $y = 4 \times 10^{-30}e^{0.036x}$ ); and **C**, Scatter plot of cumulative number of hominin species against cumulative number of hominin-bearing formations ( $R^2 = 0.97$ ,  $y = 0.57x + 0.17$ ). Data is shown in Tables [S7](#) and [S8](#).

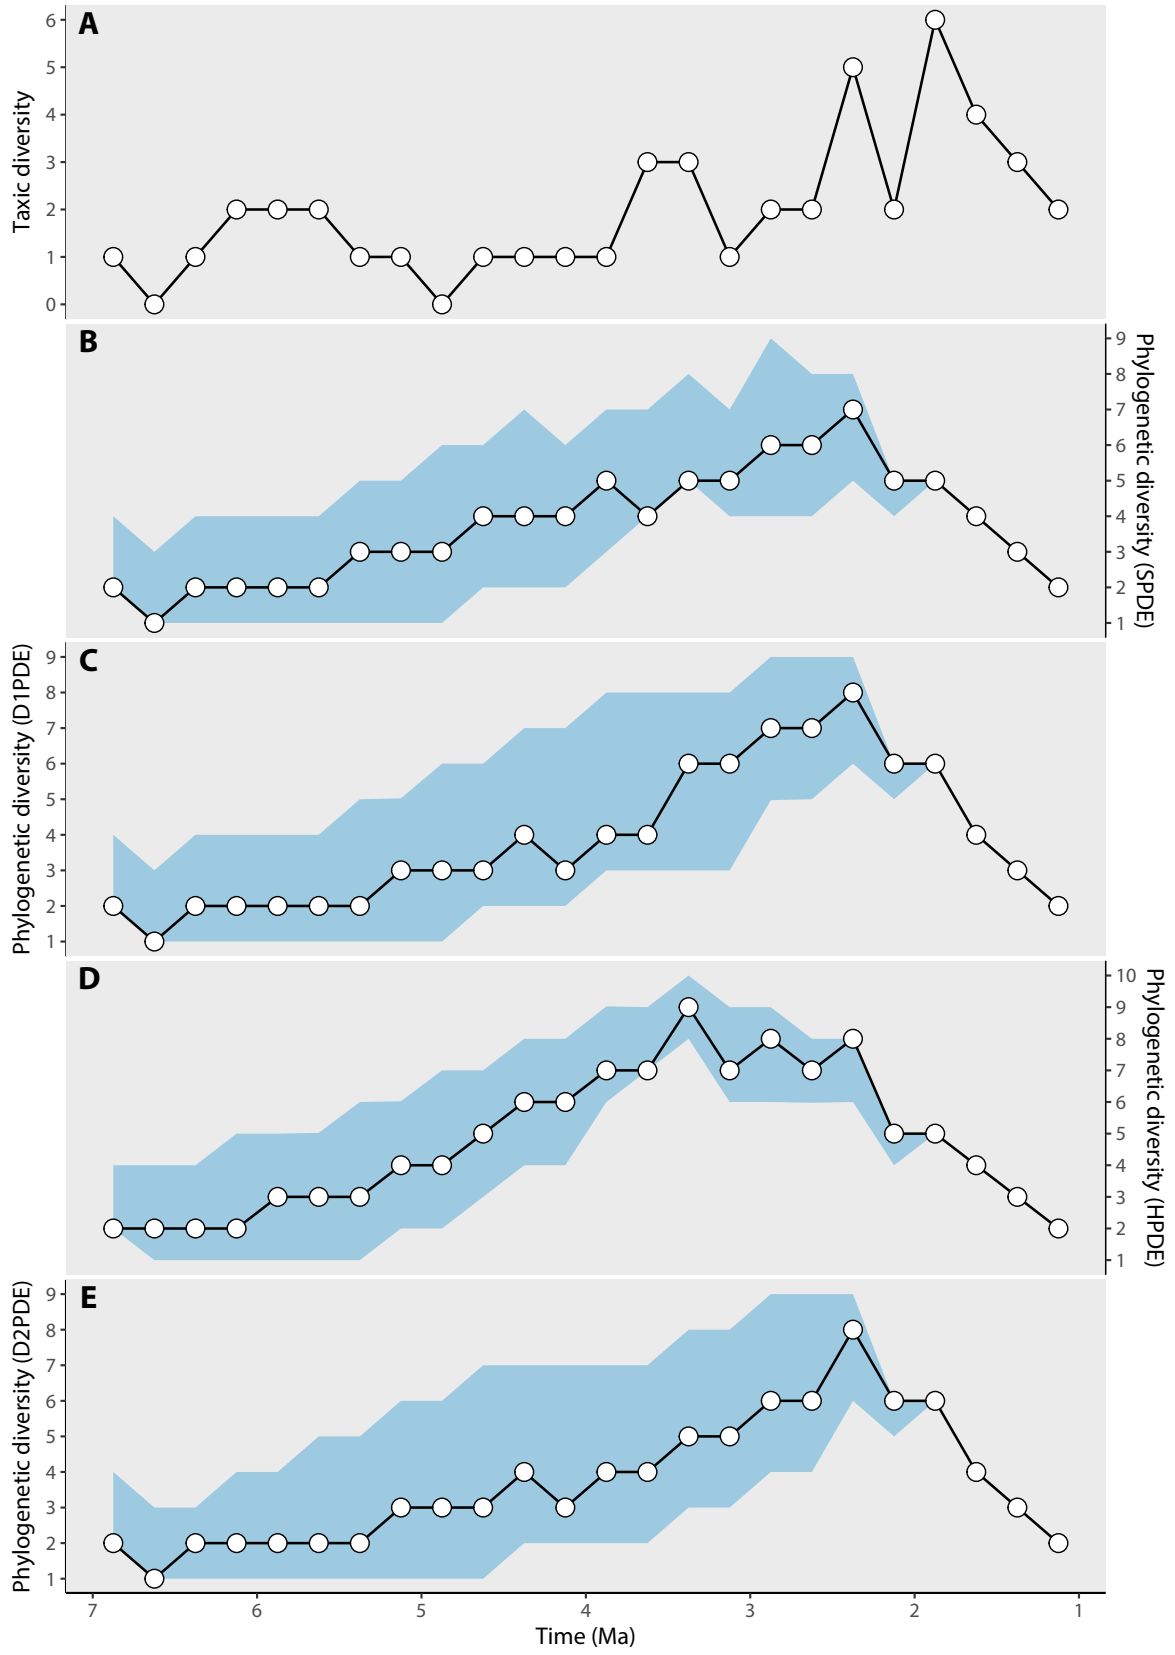

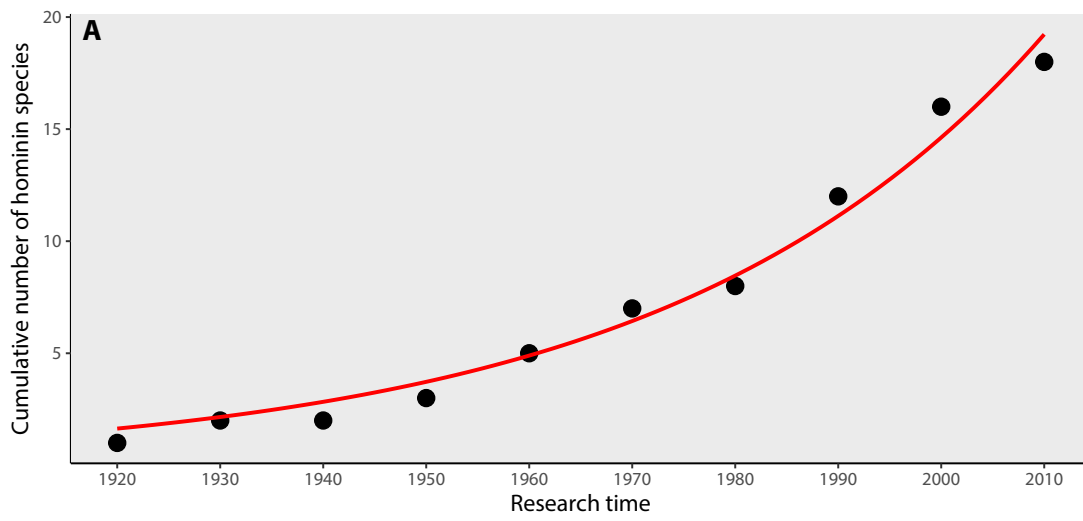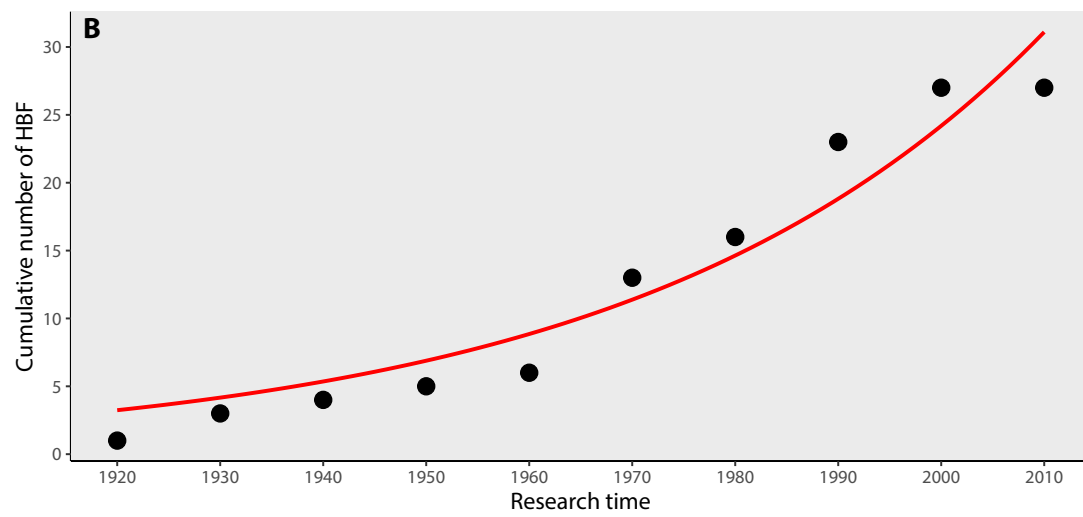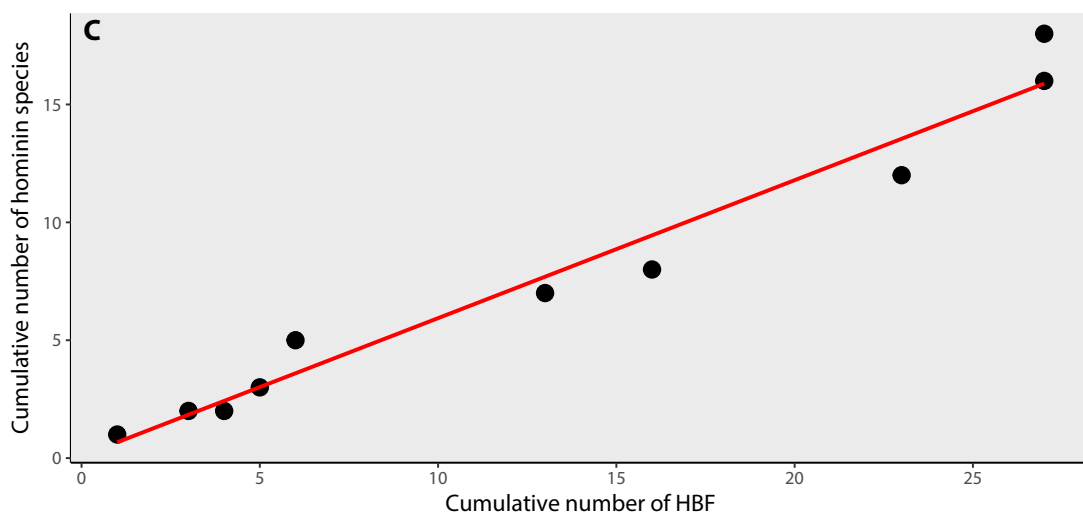

## 10. SUPPLEMENTARY INFORMATION (SI) TABLES

**Table S1:** List of abbreviations.

**Table S2:** Results of the Spearman and Kendall rank correlations comparing taxic and phylogenetic estimates of early hominin diversity, sampling metrics, and aridity. \**P* significant at 0.05 before false discovery rate correction. \*\**P* significant at 0.05 after false discovery rate correction (113). *Abbreviations:* TDE: Taxic diversity estimate; SPDE: Strait & Grine (102) phylogenetic diversity estimate; D1PDE: Dembo *et al.* (103) phylogenetic diversity estimate; HPDE: Haile-Selassie *et al.* (104) phylogenetic diversity estimate; D2PDE: Dembo *et al.* (105) phylogenetic diversity estimate; aSPDE: Strait & Grine (102) phylogenetic diversity estimate under an anagenetic scenario; aHPDE: Haile-Selassie *et al.* (104) phylogenetic diversity estimate under an anagenetic scenario; HBC: Hominin-bearing collections; HBF: Hominin-bearing formations; PBF: Primate bearing formations; MBF: Mammal-bearing formations.

**Table S3:** Results of the Spearman and Kendall rank correlations comparing Plio-Pleistocene eastern African early hominin taxic diversity ( $TDE_{EA}$ ) to counts of the number of hominin-bearing collections ( $HBC_{EA}$ ), primate-bearing formations ( $PBF_{EA}$ ), and Shultz & Maslin's (114) lake variability index (LVI), expressed as either the mean or maximum value in each 0.25 Ma bin.

**Table S4:** Results of the Generalized Least Squares (GLS) multiple regression models for taxic diversity. Models are sorted and ranked by Akaike weight ( $w_i$ ). Models with an  $w_i$  less than one-eighth that of the best model are not ranked. For those models with an  $w_i$  within one-eighth of the best model, significant predictors are shown in bold. *Parameter abbreviations:* C: Hominin-bearing collections; P: Primate-bearing formations; A: Arabian Sea aridity curve (interpolated mean data; 115). No models showed heteroscedasticity.

**Table S5:** Results of the Generalized Least Squares (GLS) multiple regression models for Plio-Pleistocene eastern African taxic diversity. Models are sorted and ranked by Akaike weight ( $w_i$ ). Models with  $w_i$  less than one-eighth that of the best model are not ranked. For those models with an  $w_i$  within one-eighth of the best model, significant predictors are shown in bold. *Parameter abbreviations:* C: Hominin-bearing collections; P: Primate-bearing formations; A: Arabian Sea aridity curve (115); W: West African aridity curve (116); L: Lake variability index expressed as the mean value per time bin. No models showed heteroscedasticity.

**Table S6:** Early hominin first and last appearance dates (117). The species name *Homo ergaster* is here used as a synonym for the entire African *Homo erectus* hypodigm and, as a result, its appearance dates are altered to reflect this.

**Table S7:** Holotype discovery year for each early hominin.

**Table S8:** First year each formation yielded an early hominin fossil.

### Abbreviation

|       |                                                                     |
|-------|---------------------------------------------------------------------|
| TDE   | Taxic diversity estimate                                            |
| PDE   | Phylogenetic diversity estimate                                     |
| SPDE  | Strait & Grine (2004) phylogenetic diversity estimate               |
| D1PDE | Dembo <i>et al.</i> (2015) phylogenetic diversity estimate          |
| HPDE  | Haile-Selassie <i>et al.</i> (2015) phylogenetic diversity estimate |
| D2PDE | Dembo <i>et al.</i> (2016) phylogenetic diversity estimate          |
| EARS  | East African Rift System                                            |
| LVI   | Lake variability index                                              |
| FDR   | False Discovery Rate                                                |
| GLS   | Generalised Least Squares                                           |
| AICc  | Second-order Akaike Information Criterion                           |
| $w_i$ | Akaike weight                                                       |

| <b>Comparison</b>           | <b>Spearman's rho</b> | <b>Kendall's tau</b> |
|-----------------------------|-----------------------|----------------------|
| TDE <i>versus</i> SPDE      | 0.286                 | 0.225                |
| TDE <i>versus</i> D1PDE     | 0.298                 | 0.202                |
| TDE <i>versus</i> HPDE      | 0.299                 | 0.217                |
| TDE <i>versus</i> D2PDE     | 0.323                 | 0.233                |
| SPDE <i>versus</i> D1PDE    | 0.792**               | 0.660**              |
| SPDE <i>versus</i> HPDE     | 0.672**               | 0.486**              |
| SPDE <i>versus</i> D2PDE    | 0.767**               | 0.613**              |
| D1PDE <i>versus</i> HPDE    | 0.789**               | 0.605**              |
| D1PDE <i>versus</i> D2PDE   | 0.967**               | 0.905**              |
| HPDE <i>versus</i> D2PDE    | 0.745**               | 0.542**              |
| SPDE <i>versus</i> aSPDE    | 0.568*                | 0.486**              |
| HPDE <i>versus</i> aHPDE    | 0.686**               | 0.557**              |
| TDE <i>versus</i> HBC       | 0.457*                | 0.312*               |
| SPDE <i>versus</i> HBC      | 0.065                 | 0.028                |
| D1PDE <i>versus</i> HBC     | 0.137                 | 0.051                |
| HPDE <i>versus</i> HBC      | 0.241                 | 0.178                |
| D2PDE <i>versus</i> HBC     | 0.073                 | 0.020                |
| TDE <i>versus</i> HBF       | 0.618*                | 0.439*               |
| SPDE <i>versus</i> HBF      | 0.215                 | 0.123                |
| D1PDE <i>versus</i> HBF     | 0.171                 | 0.099                |
| HPDE <i>versus</i> HBF      | 0.262                 | 0.178                |
| D2PDE <i>versus</i> HBF     | 0.166                 | 0.099                |
| TDE <i>versus</i> PBF       | 0.742**               | 0.565**              |
| SPDE <i>versus</i> PBF      | 0.235                 | 0.154                |
| D1PDE <i>versus</i> PBF     | 0.347                 | 0.257                |
| HPDE <i>versus</i> PBF      | 0.301                 | 0.178                |
| D2PDE <i>versus</i> PBF     | 0.354                 | 0.241                |
| TDE <i>versus</i> MBF       | 0.194                 | 0.138                |
| SPDE <i>versus</i> MBF      | 0.272                 | 0.186                |
| D1PDE <i>versus</i> MBF     | 0.294                 | 0.209                |
| HPDE <i>versus</i> MBF      | 0.067                 | 0.067                |
| D2PDE <i>versus</i> MBF     | 0.354                 | 0.241                |
| TDE <i>versus</i> aridity   | 0.123                 | 0.075                |
| SPDE <i>versus</i> aridity  | 0.126                 | 0.107                |
| D1PDE <i>versus</i> aridity | 0.203                 | 0.099                |
| HPDE <i>versus</i> aridity  | 0.183                 | 0.099                |
| D2PDE <i>versus</i> aridity | 0.243                 | 0.146                |
| HBC <i>versus</i> HBF       | 0.490*                | 0.368*               |
| HBC <i>versus</i> PBF       | 0.629*                | 0.478**              |
| HBC <i>versus</i> MBF       | 0.299                 | 0.225                |
| HBF <i>versus</i> PBF       | 0.638**               | 0.447*               |
| HBF <i>versus</i> MBF       | 0.246                 | 0.162                |
| PBF <i>versus</i> MBF       | 0.419*                | 0.304*               |
| HBC <i>versus</i> aridity   | 0.070                 | 0.051                |
| HBF <i>versus</i> aridity   | 0.173                 | 0.130                |
| PBF <i>versus</i> aridity   | 0.021                 | -0.028               |
| MBF <i>versus</i> aridity   | 0.286                 | 0.209                |

| <b>Comparison</b>                                 | <b>Spearman's rho</b> | <b>Kendall tau</b> |
|---------------------------------------------------|-----------------------|--------------------|
| TDE <sub>EA</sub> <i>versus</i> HBC <sub>EA</sub> | 0.546*                | 0.401*             |
| TDE <sub>EA</sub> <i>versus</i> PBF <sub>EA</sub> | 0.575*                | 0.390*             |
| PBF <sub>EA</sub> <i>versus</i> HBC <sub>EA</sub> | 0.864**               | 0.714**            |
| TDE <sub>EA</sub> <i>versus</i> LVI (mean)        | 0.304                 | 0.257              |
| TDE <sub>EA</sub> <i>versus</i> LVI (max.)        | 0.346                 | 0.333              |
| HBC <sub>EA</sub> <i>versus</i> LVI (mean)        | 0.404                 | 0.238              |
| HBC <sub>EA</sub> <i>versus</i> LVI (max.)        | 0.393                 | 0.276              |
| PBF <sub>EA</sub> <i>versus</i> LVI (mean)        | 0.275                 | 0.143              |
| PBF <sub>EA</sub> <i>versus</i> LVI (max.)        | 0.214                 | 0.067              |
| LVI (mean) <i>versus</i> LVI (max.)               | 0.918**               | 0.810**            |



| <b>Model</b> | <b>Parameters</b> | <b>df</b> | <b><math>w_i</math></b> | <b>AICc</b> | <b>Rank</b> |
|--------------|-------------------|-----------|-------------------------|-------------|-------------|
| 5            | PA                | 5         | 0.39                    | 57.94       | 1           |
| 7            | P                 | 4         | 0.34                    | 58.23       | 2           |
| 2            | CPA               | 6         | 0.16                    | 59.67       | 3           |
| 3            | CP                | 5         | 0.11                    | 60.48       | 4           |
| 6            | C                 | 4         | 0.00                    | 72.83       |             |
| 4            | CA                | 5         | 0.00                    | 74.56       |             |
| 1            | Null              | 3         | 0.00                    | 86.62       |             |
| 8            | A                 | 4         | 0.00                    | 88.56       |             |

| <b>Model</b> | <b>Parameters</b> | <b><math>w_i</math></b> | <b>AICc</b> | <b>Rank</b> |
|--------------|-------------------|-------------------------|-------------|-------------|
| 29           | <b>P</b>          | 0.17                    | 42.47       | 1           |
| 22           | <b>PA</b>         | 0.17                    | 42.47       | 2           |
| 23           | <b>PW</b>         | 0.15                    | 42.78       | 3           |
| 28           | <b>C</b>          | 0.06                    | 44.52       | 4           |
| 18           | <b>CP</b>         | 0.06                    | 44.72       | 5           |
| 24           | <b>PL</b>         | 0.05                    | 45.13       | 6           |
| 8            | <b>CPA</b>        | 0.04                    | 45.18       | 7           |
| 20           | <b>CW</b>         | 0.04                    | 45.25       | 8           |
| 9            | <b>CPW</b>        | 0.04                    | 45.26       | 9           |
| 14           | <b>PAW</b>        | 0.03                    | 45.78       | 10          |
| 19           | <b>CA</b>         | 0.03                    | 45.90       | 11          |
| 15           | <b>PAL</b>        | 0.03                    | 45.98       | 12          |
| 16           | <b>PWL</b>        | 0.03                    | 46.23       | 13          |
| 21           | <b>CL</b>         | 0.02                    | 47.00       |             |
| 10           | <b>CPL</b>        | 0.01                    | 48.13       |             |
| 13           | <b>CWL</b>        | 0.01                    | 48.26       |             |
| 11           | <b>CAW</b>        | 0.01                    | 48.79       |             |
| 12           | <b>CAL</b>        | 0.01                    | 48.98       |             |
| 3            | <b>CPAW</b>       | 0.01                    | 49.08       |             |
| 4            | <b>CPAL</b>       | 0.01                    | 49.51       |             |
| 5            | <b>CPWL</b>       | 0.01                    | 49.54       |             |
| 32           | <b>L</b>          | 0.01                    | 49.56       |             |
| 7            | <b>PAWL</b>       | 0.00                    | 50.03       |             |
| 27           | <b>WL</b>         | 0.00                    | 51.87       |             |
| 26           | <b>AL</b>         | 0.00                    | 51.97       |             |
| 6            | <b>CAWL</b>       | 0.00                    | 52.56       |             |
| 2            | <b>CPAWL</b>      | 0.00                    | 54.37       |             |
| 1            | <b>Null</b>       | 0.00                    | 54.63       |             |
| 17           | <b>AWL</b>        | 0.00                    | 55.46       |             |
| 31           | <b>W</b>          | 0.00                    | 56.85       |             |
| 30           | <b>A</b>          | 0.00                    | 57.23       |             |
| 25           | <b>AW</b>         | 0.00                    | 59.80       |             |

| <b>Taxon</b>                                          | <b>FAD (Ma)</b> | <b>LAD (Ma)</b> |
|-------------------------------------------------------|-----------------|-----------------|
| <i>Sahelanthropus tchadensis</i>                      | 7.00            | 7.00            |
| <i>Orrorrin tugenensis</i>                            | 6.10            | 5.70            |
| <i>Ardipithecus kadabba</i>                           | 6.30            | 5.20            |
| <i>Ardipithecus ramidus</i>                           | 4.51            | 4.30            |
| <i>Kenyanthropus platyops</i>                         | 3.54            | 3.35            |
| <i>Australopithecus anamensis</i>                     | 4.20            | 3.90            |
| <i>Australopithecus afarensis</i>                     | 3.70            | 3.00            |
| <i>Australopithecus bahrelghazali</i>                 | 3.58            | 3.58            |
| <i>Australopithecus deyiremeda</i>                    | 3.50            | 3.30            |
| <i>Australopithecus africanus</i>                     | 3.00            | 2.40            |
| <i>Australopithecus garhi</i>                         | 2.50            | 2.50            |
| <i>Australopithecus sediba</i>                        | 1.98            | 1.98            |
| <i>Paranthropus aethiopicus</i>                       | 2.66            | 2.30            |
| <i>Paranthropus boisei</i>                            | 2.30            | 1.30            |
| <i>Paranthropus robustus</i>                          | 2.00            | 1.00            |
| <i>Homo habilis</i>                                   | 2.33            | 1.65            |
| <i>Homo rudolfensis</i>                               | 2.00            | 1.78            |
| <i>Homo ergaster</i> (= African <i>Homo erectus</i> ) | 1.90            | 0.78            |

| <b>Taxon</b>                          | <b>Date</b> |
|---------------------------------------|-------------|
| <i>Australopithecus africanus</i>     | 1925        |
| <i>Paranthropus robustus</i>          | 1938        |
| <i>Paranthropus boisei</i>            | 1959        |
| <i>Homo habilis</i>                   | 1964        |
| <i>Paranthropus aethiopicus</i>       | 1968        |
| <i>Homo ergaster</i>                  | 1975        |
| <i>Australopithecus afarensis</i>     | 1978        |
| <i>Homo rudolfensis</i>               | 1986        |
| <i>Ardipithecus ramidus</i>           | 1994        |
| <i>Australopithecus anamensis</i>     | 1995        |
| <i>Australopithecus bahrelghazali</i> | 1995        |
| <i>Australopithecus garhi</i>         | 1999        |
| <i>Orrorin tugenensis</i>             | 2001        |
| <i>Ardipithecus kadabba</i>           | 2001        |
| <i>Kenyanthropus platyops</i>         | 2001        |
| <i>Sahelanthropus tchadensis</i>      | 2002        |
| <i>Australopithecus sediba</i>        | 2010        |
| <i>Australopithecus deyiremeda</i>    | 2015        |

| <b>Formation</b>          | <b>Date</b> |
|---------------------------|-------------|
| Taung                     | 1925        |
| Laetoli Beds              | 1935        |
| Cradle of Humankind (CoH) | 1938        |
| Makapansgat               | 1948        |
| Olduvai Beds              | 1959        |
| Humbu Formation           | 1964        |
| Koobi Fora Formation      | 1970        |
| Shungura Formation        | 1970        |
| Chemoigut Formation       | 1971        |
| Usno Formation            | 1974        |
| Melka Kunture Formation   | 1974        |
| Lukeino Formation         | 1975        |
| Hadar Formation           | 1978        |
| Sagantole Formation       | 1984        |
| Chemeron Formation        | 1985        |
| Nachukui Formation        | 1989        |
| Konso Formation           | 1992        |
| Matabaietu Formation      | 1993        |
| Kanapoi Formation         | 1994        |
| Koro Toro                 | 1995        |
| Chiwondo Beds             | 1995        |
| Busidima Formation        | 1996        |
| Bouri Formation           | 1999        |
| Adu-Asa Formation         | 2001        |
| Anthracotheriid Unit      | 2002        |
| Ndolanya Beds             | 2002        |
| Woranso-Mille             | 2004        |
| Mount Galili Formation    | 2005        |

## 11. Supporting Information (SI) References

1. Brunet, M., Frank, G., Pilbeam, D.R., Lieberman, D.E., Likius, A., Mackaye, H.T., Ponce de León, M.S., Zollikofer, C.P.E., Vignaud, P., 2005. New material of the earliest hominid from the Upper Miocene of Chad. *Nature*, **434**(7034), 752–755.
2. Brunet, M., Guy, F., Pilbeam, D.R., Mackaye, H.T., Likius, A., Ahounda, D., Beauvilain, A., Blondel, C., Bocherens, H., Boisserie, J.-R., De Bonis, L., Coppens, Y., Dejax, L., Denys, C., Douring, P., Eisenmann, V., Fanone, G., Fronty, P., Geraads, D., Lehmann, T., Lihoreau, F., Louchart, A., Mahamat, A., Merceron, G., Mouchelin, G., Otero, O., Campomanes, P.P., Ponce De Leon, M.S., Rage, J.-C., Sapanet, M., Schuster, M., Sudre, J., Tassy, P., Valentin, X., Vignaud, P., Viriot, L., Zazzo, A., Zollikofer, C.P.E., 2002. A new hominid from the Upper Miocene of Chad, Central Africa. *Nature*, **418**(6894), 145–151.
3. Simpson, S.W., Kleinsasser, L., Quade, J., Levin, N.E., McIntosh, W.C., Dunbar, N., Semaw, S., Rogers, M.J., 2015. Late Miocene hominin teeth from the Gona Paleanthropological Research Project area, Afar, Ethiopia. *Journal of Human Evolution*, **81**, 68–82.
4. Senut, B., Pickford, M., Gommery, D., Meind, P., Cheboie, K., Coppens, Y., 2001. First hominid from the Miocene (Lukeino Formation, Kenya). *Comptes Rendus de l'Académie des Sciences (Series IIA) Earth and Planetary Science*, **332**(2), 137–144.
5. Haile-Selassie, Y., 2001. Late Miocene hominids from the Middle Awash, Ethiopia. *Science*, **412**(6843), 178–181.
6. Haile-Selassie, Y., Suwa, G., White, T.D., 2004. Late Miocene teeth from Middle Awash, Ethiopia, and early hominid dental evolution. *Science*, **303**(5663), 1503–1505.
7. Haile-Selassie, Y., Suwa, G., White, T.D., 2009. Hominidae. In: Y. Haile-Selassie, G. WoldeGabriel (eds.), *Ardipithecus kadabba – Evidence from the Late Miocene of Africa*, University of California Press, Berkeley, pp. 159–236.
8. Semaw, S., Simpson, S.W., Quade, J., Renne, P.R., Butler, R.F., McIntosh, W.C., Levin, N.E., Dominguez-Rodrigo, M., Rogers, M.J., 2005. Early Pliocene hominids from Gona, Ethiopia. *Nature*, **433**(7023), 301–305.
9. White, T.D., Suwa, G., Asfaw, B., 1994. *Australopithecus ramidus*, a new species of early hominid from Aramis, Ethiopia. *Nature*, **371**(6495), 306–312.
10. White, T.D., Suwa, G., Asfaw, B., 1995. Corrigendum. *Nature*, **375**(6526), 88.
11. White, T.D., Asfaw, B., Beyene, Y., Haile-Selassie, Y., Lovejoy, C.O., Suwa, G., WoldeGabriel, G., 2009. *Ardipithecus ramidus* and the palaeobiology of early hominids. *Science*, **326**(5949), 75–86.
12. Deino, A.L., Hill, A., 2002. <sup>40</sup>Ar/<sup>39</sup>Ar dating of Chemeron Formation strata encompassing the site of hominid KNM-BC 1, Tugen Hills, Kenya. *Journal of Human Evolution*, **42**(1-2), 141–151.
13. White, T.D., WoldeGabriel, G., Asfaw, B., Ambrose, S., Beyene, Y., Bernor, R.L., Boisserie, J.-R., Currie, B., Gilbert, H., Haile-Selassie, Y., Hart, W.K., Hlusko, L.J., Howell, F.C., Kono, R.T., Lehmann, T., Louchart, A., Lovejoy, C.O., Renne, P.R., Saegusa, H., Vrba, E.S., Wesselman, H., Suwa, G., 2006. Asa Issie, Aramis and the origin of *Australopithecus*. *Nature*, **440**(7086), 883–889.
14. Fleagle, J.G., Rasmussen, D.T., Yirga, S., Bown, T.M., Grine, F.E., 1991. New hominid fossils from Fejej, Southern Ethiopia. *Journal of Human Evolution*, **21**(2), 145–152.
15. Urbanek, C., Faupl, P., Hujer, W., Ntaflos, T., Richter, W., Weber, G., Schaefer, K., Viola, B., Gunz, P., Neubauer, S., Stadlmayr, A., Kullmer, O., Sandrock, O., Nagel, D., Conroy, G., Falk, D., Woldearegay, K., Said, H., Assefa, G., Seidler, H., 2005. Geology, paleontology and paleoanthropology of the Mount Galili Formation in the southern Afar Depression, Ethiopia – Preliminary results. *Joannea Geologie Paläontologie*, **6**, 29–43.

16. Leakey, M.G., Feibel, C.S., McDougall, I., Walker, A.C., 1995. New four-million-year-old hominid species from Kanapoi and Allia Bay, Kenya. *Nature*, **376**(6541), 565–571.
17. Leakey, M.G., Feibel, C.S., McDougall, I., Ward, C.V., Walker, A.C., 1998. New specimens and confirmation of an early age for *Australopithecus anamensis*, *Nature*. **393**(6680), 62–66.
18. Harrison, T., 2011. Hominins from the Upper Laetolil and Upper Ndolanya Beds, Laetoli. In: Harrison, T. (ed.), *Paleontology and Geology of Laetoli: Human Evolution in Context. Volume 2: Fossil Hominins and the Associated Fauna*. Springer, Dordrecht, pp. 141–188.
19. Asfaw, B., 1987. The Belohdelie frontal: new evidence of early hominid cranial morphology from the Afar of Ethiopia. *Journal of Human Evolution*, **16**(7–8), 611–624.
20. Leakey, M.G., Spoor, F., Brown, F.H., Gathogo, P.N., Kiarie, C., Leakey, L.N., McDougall, I., 2001. New hominin genus from eastern Africa shows diverse middle Pliocene lineages. *Nature*, **410**(6824), 433–440.
21. Haile-Selassie, Y., Saylor, B., Deino, A.L., Alene, M., Latimer, B., 2010b. New hominid fossils from Woranso-Mille (central Afar, Ethiopia) and taxonomy of early *Australopithecus*. *American Journal of Physical Anthropology*, **141**, 406–417.
22. Brunet, M., Beauvilain, A., Coppens, Y., Heintz, E., Moutaye, A.H.E., Pilbeam, D., 1995. The first australopithecine 2,500 kilometres west of the Rift Valley (Chad), *Nature*. **378**(6554), 273–275.
23. Haile-Selassie, Y., Latimer, B., Alene, M., Deino, A.L., Gibert, L., Melillo, S.M., Saylor, B., Scott, G.R., Lovejoy, O.C., 2010a. An early *Australopithecus afarensis* postcranium from Woranso-Mille, Ethiopia. *Proceedings of the National Academy of Sciences*. **107**, 12121–12126.
24. Kimbel, W.H., Rak, Y., Johanson, D.C., 2004. The skull of *Australopithecus afarensis*. Oxford University Press, Oxford & New York.
25. Kimbel, W.H., 1988. Identification of a partial cranium of *Australopithecus afarensis* from the Koobi Fora Formation, Kenya. *Journal of Human Evolution*, **17**(7), 647–656.
26. Ward, C.V., Leakey, M.G., Walker, A.C., 1999b. The new hominid species *Australopithecus anamensis*. *Evolutionary Anthropology*, **7**(6), 197–205.
27. White, T.D., Suwa, G., Simpson, S., Asfaw, B., 2000. Jaws and teeth of *Australopithecus afarensis* from Maka, Middle Awash, Ethiopia. *American Journal of Physical Anthropology*, **111**(1), 45–68.
28. Haile-Selassie, Y., Melillo, S.M., 2015. Middle Pliocene hominin mandibular fourth premolars from Woranso-Mille (Central Afar, Ethiopia). *Journal of Human Evolution*, **78**, 44–59.
29. Howell, F.C., Coppens, Y., 1974. Inventory of remains of Hominidae from Pliocene/Pleistocene formations of the Lower Omo Basin, Ethiopia (1967 – 1972). *American Journal of Physical Anthropology*, **40**(1), 1–16.
30. Suwa, G., 1990. A comparative analysis of hominid dental remains from the Shungura and Usno Formations, Omo Valley, Ethiopia. Ph.D. thesis, University of California, Berkeley.
31. Tobias, P.V., Copley, K., Brain, C.K., 1977. South Africa. In: Oakley, K.P., Campbell, B.G., Molleson, T.I. (eds.), *Catalogue of Fossil Hominids, Part 1: Africa*. Trustees of the British Museum (Natural History) London, The George Press, Kettering, pp. 95–152.
32. Wood, B.A., Leakey, M.G., 2011. The Omo-Turkana Basin fossil hominins and their contribution to our understanding of human evolution in Africa. *Evolutionary Anthropology*, **20**(6), 264–292.
33. Dart, R.A., 1925. *Australopithecus africanus*: the ape-man from South Africa, *Nature*. **114**(2884), 195 – 199.

34. Berger, L.R., A.W. Keyser, P.V. Tobias, 1993. Gladysvale: first early hominid site discovered in South Africa since 1948. *American Journal of Physical Anthropology*, **92**(1) 107–111.
35. Asfaw, B., White, T.D., Lovejoy, C.O., Latimer, B., Simpson, S., Suwa, G., 1999. *Australopithecus garhi*: a new species of early hominid from Ethiopia. *Science*, **284**(5414), 629–635.
36. Kullmer, O., Sandrock, O., Abel, R., Schrenk, F., Bromage, T.G., Juwayeyi, Y.M., 1999. The first *Paranthropus* from the Malawi Rift. *Journal of Human Evolution*, **37**(1), 121–127.
37. Hill, A., Ward, S., Deino, A.L., Curtis, G., 1992. Earliest *Homo*. *Nature*, **355**, 719–722.
38. Kimbel, W.H., Walter, R.C., Johanson, D.C., Reed, K.E., Aronson, J.L., Assefa, Z., Marean, C.W., Eck, G.G., Bobe, R., Hovers, E., Rak, Y., Vondra, C., Yemane, T., York, D., Chen, Y., Evensen, N.M., Smith, P.E., 1996. Late Pliocene *Homo* and Oldowan tools from the Hadar Formation (Kada Hadar Member), Ethiopia. *Journal of Human Evolution*, **31**(6), 549–561.
39. Jungers, W.L., Grine, F.E., Leakey, M.G., Leakey, L.N., Brown, F., Yang, D., Tocheri, M.W., 2015. New hominin fossils from Ileret (Kolom Odiet), Kenya. *American Journal of Physical Anthropology*, **S60**, 181.
40. Alemseged, Z., Coppens, Y., Geraads, D., 2002. Hominid cranium from Omo: Description and taxonomy of Omo-323-1976-896. *American Journal of Physical Anthropology*, **117**(2), 103–112.
41. Berger, L.R., de Ruiter, J.D., Churchill, S.E., Schmid, P., Carlson, K.J., Dirks, P.H.G.M., Kibii, J.M., 2010. *Australopithecus sediba*: a new species of *Homo*-like australopith from South Africa. *Science*, **328**(5975), 195–204.
42. Leakey, L.S.B., 1959. A new fossil skull from Olduvai. *Nature*, **184**(4685), 491–493.
43. Simpson, S.W., Quade, J., Levin, N.E., Butler, R., Dupont-Nivet, G., Everett, M., Semaw, S., 2008. A female *Homo erectus* pelvis from Gona, Ethiopia. *Science*, **322**(5904), 1089–1092.
44. Keyser, A.W., Menter, C.G., Moggi-Cecchi, J., Pickering, T.R., Berger, L.R., 2000. Drimolen: a new hominid-bearing site in Gauteng, South Africa. *South African Journal of Science*, **96**, 193–197.
45. Walker, A.C., Leakey, R.E.F., 1993. *The Nariokotome Homo erectus Skeleton*. Harvard University Press, Massachusetts, pp. 195–219.
46. Leakey, L.S.B., Leakey, M.D., 1964. Recent discoveries of fossil hominids in Tanganyika: at Olduvai and near Lake Natron. *Nature*, **202**, 3–5.
47. Tobias, P.V., 1991. *Olduvai Gorge, Volume 4: The Skulls, Endocasts and Teeth of Homo habilis*. Cambridge University Press, Cambridge.
48. Chavaillon, J., Chavaillon, N., Coppens, Y., Senut, B., 1977. Présence d’Hominidé dans le site oldowayen de Gomboré I à Melka Konturé. *Comptes Rendus de l’Académie des Sciences*, **285**, 961–963.
49. Semaw, S., Schick, K., Toth, N., Rogers, M.J., Quade, J., Simpson, S.W., Dominguez-Rodrigo, M., 2001. Further 2.5–2.6 million-year-old artifacts, new Plio-Pleistocene archaeological sites and hominid discoveries of 1999 from Gona, Ethiopia. Abstracts for the Paleoanthropology Society Meetings (Kansas City), *Journal of Human Evolution*, **40**(3), pp. A20.
50. de Ruiter, D.J., Pickering, R., Steininger, C.M., Kramers, J.D., Hancox, P.J., Churchill, S.E., Berger, L.R., Backwell, L., 2009. New *Australopithecus robustus* fossils and associated U-Pb dates from Cooper’s Cave (Gauteng, South Africa). *Journal of Human Evolution*, **56**(5), 497–513.
51. Suwa, G., Asfaw, B., Haile-Selassie, Y., White, T.D., Katoh, S., WoldeGabriel, G., Hart, W.K., Nakaya, H., Beyene, Y., 2007. Early Pleistocene *Homo erectus* fossils from Konso, southern Ethiopia. *Anthropological Science*, **115**(2), 133–151.



52. Gowlett, J.A.J., Harris, J.W.K., Walton, D., Wood, B.A., 1981. Early archaeological sites, hominid remains and traces of fire from Chesowanja, Kenya. *Nature*, **294**, 125–129.
53. Domínguez-Rodrigo, M., Pickering, T.R., Baquedano, E., Mabulla, A., Mark, D.F., Musiba, C., Bunn, H.T., UribeArrea, D., Smith, V., Diez-Martin, F., Pérez-González, A., Sánchez, P., Santonja, M., Barboni, D., Gidna, A., Ashley, G., Yravedra, J., Heaton, J. L., Arriaza, M.C., 2013. First partial skeleton of a 1.34-million-year-old *Paranthropus boisei* from Bed II, Olduvai Gorge, Tanzania. *PLOS ONE*, **8**(12), e80347.
54. Condemni, S., 2004. The Garba IV mandible. In: Chavaillon, J., Piperno, M. (eds.), *Studies on the Early Paleolithic site of Melka Kunture, Ethiopia, Istituto Italiano di Preistoria e Protostoria*, Florence, pp. 687–702.
55. Grine, F.E., 1989. New hominid fossils from the Swartkrans Formation (1979 – 1986 excavations): craniodental specimens. *American Journal of Physical Anthropology*, **79**(4), 409–449.
56. Geraads, D., 1987. Dating the Northern African cercopithecoid fossil record. *Human Evolution*, **2**(1), 19–27.
57. Senut, B., 1994. Cercopithecoidea Néogènes et Quaternaires du Rift Occidental (Ouganda). In: Senut, B., Pickford, M., (eds), *Geology and Palaeobiology of the Albertine Rift Valley, Uganda–Zaire. Volume II: Palaeobiology*, CIFEG Occasional Publication, 1994/29, Orleans, pp. 195–205.
58. Kingston, J., Jacobs, B.F., Hill, A., Deino, A.L., 2002. Stratigraphy, age and environments of the late Miocene Mpesida Beds, Tugen Hills, Kenya. *Journal of Human Evolution*, **42**, 92–116.
59. Deino, A.L., Ambrose, S.H., 2007. <sup>40</sup>Ar/<sup>39</sup>Ar dating of the Lemudong’o late Miocene fossil assemblages, southern Kenya Rift. *Kirtlandia*, **56**, 65–71.
60. Stromer, E., 1913. Mitteilungen ueber die Wirbeltierreste aus dem Mittelpliocän des Natrontales (Ägypten). *Zeitschrift der Deutsche Geologischen Gesellschaft*, **65**, 350–372.
61. Stromer, E., 1920. Mitteilungen über Wirbeltierreste aus dem Mittelpliocän des Natrontales (Ägypten), 5. Nachtrag zur Affen. *Sitzungsberichte der Bayerischen Akademie der Wissenschaften*, **1920**, 345–370.
62. Pickford, M., Senut, B., Hadoto, D., 1993. *Geology and Palaeobiology of the Albertine Rift Valley, Uganda-Zaire. Volume 1: Geology*. International Centre for Training and Exchanges in the Geosciences (CIFEG), Occasional Paper 1993/24, Orleans, pp. 195–205.
63. Frost, S.R., Haile-Selassie, Y., Hlusko, L.G., 2009. Cercopithecidae. In: Haile-Selassie, Y., WoldeGabriel, G. (eds.), *Ardipithecus kadabba – Evidence from the Late Miocene of Africa*, University of California Press, Berkeley, pp. 135–158.
64. Grine, F.E., Hensley, Q.B., 1981. Earliest primate remains from South Africa. *South African Journal of Science*, **77**, 374–376.
65. Walker, A.C., 1987. Fossil Galaginae from Laetoli. In: Leakey, M.D., Harris, J.M. (eds.), *Laetoli: A Pliocene Site in Northern Tanzania*. Clarendon Press, Oxford, pp. 88–90.
66. Leakey, M.G., Teaford, M.F., Ward, C.V., 2003. Cercopithecidae from Lothagam. In: Leakey, M.G., Harris, J.M. (eds.), *Lothagam: The Dawn of Humanity in Eastern Africa*. Columbia University Press, New York, pp. 201–248
67. Jablonski, N.G., Leakey, M.G., Antón, M., 2008. Systematic paleontology of the cercopithecines. In: Jablonski, N.G., Leakey, M.G. (eds.), *Koobi Fora Research Project: Volume 6. The Fossil Monkeys*. California Academy of Sciences, San Francisco, pp. 103–300.
68. Jablonski, N.G., Leakey, M.G., Ward, C.V., Antón, M., 2008. Systematic paleontology of the large colobines. In: Jablonski, N.G., Leakey, M.G. (eds.), *Koobi Fora Research Project: Volume 6. The Fossil Monkeys*. California Academy of Sciences, San Francisco, pp. 31–102.

69. Harrison, T., 2011. Cercopithecids (Cercopithecidae, Primates). In: Harrison, T. (ed.), *Paleontology and Geology of Laetoli: Human Evolution in Context. Volume 2: Fossil Hominins and the Associated Fauna*, Springer, Dordrecht, pp. 83–140.
70. Freedman, L., 1957. The fossil Cercopithecoidea of South Africa. *Annals of the Transvaal Museum*, **23**, 8–262.
71. Freedman, L., 1976. South African fossil Cercopithecoidea: a re-assessment including a description of new material from Makapansgat, Sterkfontein and Taung. *Journal of Human Evolution*, **5**(3), 311–315.
72. Frost, S.R., 2001a. Fossil Cercopithecidae of the Afar Depression, Ethiopia: Species systematics and comparison to the Turkana Basin. PhD thesis, City University of New York, New York, pp. 463.
73. Frost, S.R., 2001b. New Early Pliocene Cercopithecidae (Mammalia: Primates) from Aramis, Middle Awash Valley, Ethiopia. *American Museum Novitates*, **3350**, 1–36.
74. Delson, E., 1980. Fossil macaques, phyletic relationships and a scenario of deployment. In: D.G. Lindburg (ed.), *The Macaques: Studies in Ecology, Behavior and Evolution*. Van Nostrand Reinhold, New York, pp. 10–30.
75. Boaz, N.T., Bernor, R.L., Brooks, A.S., Cooke, H.B.S., de Heinzelin, J.D., Dechamps, R., Delson, E., Gentry, A.W., Harris, J.W.K., Meylan, P., Pavlakis, P.P., Sanders, W.J., Stewart, K.M., Verniers, J., Williamson, P.G., Winkler, A.J., 1992. A new evaluation of the significance of the Late Neogene Lusso Beds, Upper Semliki Valley, Zaire. *Journal of Human Evolution*, **22**, 505–517.
76. Delson, E., 1993. *Theropithecus* fossils from Africa and India and the taxonomy of the genus. In: Jablonski, N.G. (ed.), *Theropithecus: The Rise and Fall of a Primate Genus*. Cambridge University Press, Cambridge, pp. 157–189.
77. Frost, S.R., Plummer, T., Bishop, L.C., Ditchfield, P., Ferraro, J., Hicks, J., 2003b. Partial cranium of *Cercopithecoides kimeui* Leakey, 1982 from Rawi Gully, southwestern Kenya. *American Journal of Physical Anthropology*, **122**, 191–199.
78. Frost, S.R., 2014. Fossil Cercopithecidae of the Konso Formation, *University Museum, University of Tokyo Bulletin*, **47**, 41–72.
79. Pickford, M., Mein, P., Senut, B., 1994. Fossiliferous Neogene karst fillings in Angola, Botsawana and Namibia. *Suid-Afrikaanse Tydskrif vir Natuurwetenskap*, **90**, 227–230.
80. Lihoreau, F. 2003. Systématique et paléocéologie des Anthracotheriidae (Artiodactyla; Suiformes) du Mio-Pliocène de l’Ancien Monde: Implications paléobiogéographiques. PhD thesis, University of Poitiers, France.
81. Guérin, C., 1966. *Diceros douariensis* nov. sp., un Rhinocéros du Mio-Pliocène de Tunisie du Nord. *Documents des Laboratoires de Géologie de la Faculté des Sciences de Lyon*, **16**, 1–50.
82. Kleinsasser, L.L., Quade, J., McIntosh, W.C., Levin, N.E., Simpson, S.W., Semaw, S., 2008, Stratigraphy and geochronology of the late Miocene Adu-Asa Formation at Gona, Ethiopia. In: Quade, J., Wynn, J.G. (eds.), *The Geology of Early Humans in the Horn of Africa*, Geological Society of America Special Paper, **446**, pp. 33–65.
83. Pickford, M., Senut, B., 1997. Cainozoic mammals from coastal Namaqualand, South Africa. *Palaeontologia Africana*, **34**, 199–217.
84. Geraads, D., 1998. Rongeurs du Mio-Pliocène de Lissasfa (Casablanca, Maroc). *Geobios*, **31**, 229–245.
85. Quade, J., Levin, N.E., Simpson, S.W., Butler, R., McIntosh, W.C., Semaw, S., Kleinsasser, L., Dupont-Nivet, G., Renne, P., Dunbar, N., 2008. The geology of Gona, Afar, Ethiopia. In: J. Quade, J.G. Wynn (eds.), *The Geology of Early Humans in the Horn of Africa*, Geological Society of America Special Paper, **446**, pp. 1–31.
86. Harrison, T., Baker, E., 1997. Paleontology and biochronology of fossil localities in the Manonga Valley, Tanzania. In: Harrison, T. (ed.), *Neogene Paleontology of the Manonga Valley, Tanzania: A Window into the Evolutionary History of East Africa*. Plenum Press, New York, pp. 361–393.
87. Brunet, M., Beauvilain, A., Billiou, D., Bocherens, H., Boisserie, J.-R., de Bonis, L.,

- Branger, P., Brunet, A., Coppens, Y., Daams, R., Dejax, J., Denys, C., Düringer, P., Eisenmann, V., Fanoné, F., Fronty, P., Gayet, M., Geraads, D., Guy, F., Kasser, M., Koufos, G., Likies, A., Lopez-Martinez, N., Louchart, A., MacLatchy, L.M., Mackaye, H. T., Marandat, B., Mouchelin, G., Mourer-Chauviré, C., Otero, O., Peigné, S., Campomanes, P. P., Pilbeam, D., Rage, J. C., de Ruiter, D.J., Schuster, M., Sudre, J., Tassy, P., Vignaud, P., Viriot, L., Zazzo, A., 2000. Chad: Discovery of a vertebrate fauna close to the Mio-Pliocene boundary. *Journal of Vertebrate Paleontology*, **20**, 205–209.
88. Tassy, P., 1995. Les Proboscidiens (Mammalia) Fossiles du Rift Occidental, Ouganda. In: Pickford, M., Senut, B. (eds.), *Geology and Palaeobiology of the Albertine Rift Valley, Uganda-Zaire. Vol. II: Palaeobiology*. CIFE Occasional Publications, 1994/29, Orléans, pp. 217–257.
  89. Bromage, T.G., Schrenk, F., Juwayeyi, Y.M. 1995. Paleobiogeography of the Malawi Rift: Age and vertebrate paleontology of the Chiwondo Beds, northern Malawi, *Journal of Human Evolution*, **28**, 37–57.
  90. Drapeau, M.S.M., Bobe, R., Wynn, J.G., Campisano, C.J., Dumouchel, L., Geraads, D., 2014. The Omo Mursi Formation: a window into the East African Pliocene. *Journal of Human Evolution*, **75**, 64–79.
  91. Leakey, M.G., Harris, J.M., 2003. *Lothagam: The Dawn of Humanity in Eastern Africa*. Columbia University Press, New York.
  92. McDougall, I., Brown, F.H., Vasconcelos, P.M., Cohen, B., Thiede, D., Buchanan, M., 2012. New single crystal <sup>40</sup>Ar/<sup>39</sup>Ar ages improve time scale for deposition of the Omo Group, Omo-Turkana Basin, East Africa. *Journal of the Geological Society of London*, **169**, 213–226.
  93. Brunet, M., Beauvilain, A., Geraads, D., Guy, F., Kasser, M., Mackaye, H.T., MacLatchy, L.M., Mouchelin, G., Sudre, J., Vignaud, P., 1998. Tchad: Découverte d'une faune de mammifères du Pliocène inférieur. *Comptes Rendus de l'Académie des Sciences (Series IIA) Earth and Planetary Science*, **326**, 153–158.
  94. Feibel, C.S., Brown, F.H., McDougall, I., 1989, Stratigraphic context of fossil hominids from the Omo group deposits: Northern Turkana Basin, Kenya and Ethiopia, *American Journal of Physical Anthropology*, **78**(4), 595–622.
  95. Ditchfield, P., Hicks, J., Plummer, T., Bishop, L.C., Potts, R., 1999. Current research on the Late Pliocene and Pleistocene deposits north of Homa Mountain, southwestern Kenya, *Journal of Human Evolution*, **36**(2), 123–150.
  96. Isaac, G.L., 1967. The stratigraphy of the Peninj Group-early middle Pleistocene formations west of Lake Natron, Tanzania. In: Bishop, W.W., Clark, J.D. (eds.), *Background to evolution in Africa*: Chicago, University of Chicago Press, pp. 229–257.
  97. de Bonis L., Geraads D., Jaeger J.-J., Sen S., 1988, Vertébrés du Pléistocène de Djibouti, *Bulletin de la Société Géologique de France*, **4**, 323–334.
  98. Chavaillon, J., Boisubert, J.-L., Faure, M., Guérin, C.I., Ma, J.-L., Nickel, B., Poupeau, G., Rey, P., Warsama, S.A., 1987. Le site de dépeçage Pléistocène à *Elephas recki* de Barogali (République de Djibouti), *Comptes Rendus de l'Académie des Sciences (Series IIA) Earth and Planetary Science*, **305**, 1259–1266.
  99. Isaac, G.L., Curtis, G.H., 1974. Age of early Acheulian industries from the Peninj Group, Tanzania, *Nature*, **249**, 624–627.
  100. Werdelin, L., 2010, Chronology of Neogene Mammal Localities. In: Werdelin, L., Sanders, W.J., *Cenozoic Mammals of Africa*, University of California Press, Berkeley, pp. 27–43.
  101. Ghinassi, M., Papini, M., Yoseph, L., Rook, L., 2009b. Palaeoenvironments of the Buia *Homo* site: High-resolution facies analysis and non-marine sequence stratigraphy in the Alat formation (Pleistocene Dandiero Basin, Danakil depression, Eritrea). *Palaeogeography Palaeoclimatology Palaeoecology*, **280**, 415–431.
  102. Strait DS, Grine FE (2004) Inferring hominoid and early hominid phylogeny using craniodental characters: the role of fossil taxa. *J Hum Evol* 47(6): 399-452.

103. Dembo M, Matzke NJ, Mooers AØ, Collard M (2015) Bayesian analysis of a morphological supermatrix sheds light on controversial fossil hominin relationships. *Proc R Soc B* 282(1812): 20150943.
104. Haile-Selassie Y, Gibert L, Melillo SM, Ryan TM, Alene M, Deino AL, Levin NE, Scott G, Saylor BZ (2015) New species from Ethiopia further expands Middle Pliocene hominin diversity. *Nature* 521(7553), 483-488.
105. Dembo M, Radovčić D, Garvin HM, Laird MF, Schroeder L, Scott JE, Brophy J, Ackermann RR, Musiba CM, de Ruiter DJ, Mooers AØ, Collard M (2016) The evolutionary relationships and age of *Homo naledi*: an assessment using dated Bayesian phylogenetic methods. *J Hum Evol* 97:17-26.
106. Strait DS, Grine FE, Fleagle JG (2007) Analyzing hominid phylogeny. *Handbook of Paleoanthropology*, eds. Henke W, Hardt T, Tattersall I (Springer, New York, US), pp. 1781-1806.
107. Norell MA (1993) Tree-based approaches to understanding history: comments on ranks, rules, and the quality of the fossil record. *Am J Sci* 293: 407-417.
108. Foote M (1996) On the probability of ancestors in the fossil record. *Paleobiology* 22(2): 141-151.
109. Kimbel WH, Lockwood CA, Ward CV, Leakey MG, Rak Y, Johanson DC (2006) Was *Australopithecus anamensis* ancestral to *A. afarensis*? A case of anagenesis in the hominin fossil record. *J Hum Evol* 51(2): 134-152.
110. Wood BA, Schroer K (2013) *Paranthropus. A Companion to Paleoanthropology*, ed. Begun DR (Wiley-Blackwell, Chichester, UK), pp. 457-478.
111. Lane A, Janis CM, Sepkoski JJ (2005) Estimating paleodiversities: a test of the taxic and phylogenetic methods. *Paleobiology* 31(1): 21-34.
112. Benton MJ, Dunhill AM, Lloyd GT, Marx FG (2011) *Assessing the quality of the fossil record: insights from vertebrates. Comparing the Geological and Fossil Records: Implications for Biodiversity Studies*, eds. McGowan AJ, Smith AB (Geological Society of London, Bath, UK), pp. 63-94.
113. Benjamini Y, Hochberg Y (1995) Controlling the false discovery rate: a practical and powerful approach to multiple testing. *J R Stat Soc B Stat Methodol* 57(1):289-300.
114. Shultz S, Maslin MA (2013) Early human speciation, brain expansion and dispersal influenced by African climate pulses. *PLOS ONE* 8(10): e76750.
115. deMenocal PB (1995) Plio-Pleistocene African climate. *Science* 270(5233):53-59.
116. Tiedemann R, Sarnthein M, Shackleton NJ (1994) Astronomic timescale for the Pliocene Atlantic  $\delta^{18}\text{O}$  and dust flux records Ocean Drilling Program site 659. *Paleoceanography* 9:619-638.
117. Wood BA, Boyle EK (2016) Hominin taxic diversity: fact or fantasy? *Am J Phys Anthropol* 159:S37-S78.
